# Supplementary material for: Contrasting effects of defaunation on aboveground carbon storage across the global tropics
Source: PubMed Central journal article supplement (PMC4848488; doi:10.1038/ncomms11351), 2016-04-25
Supplement: ncomms11351-s1.pdf [file ncomms11351-s1.pdf]

## Supplementary Figures

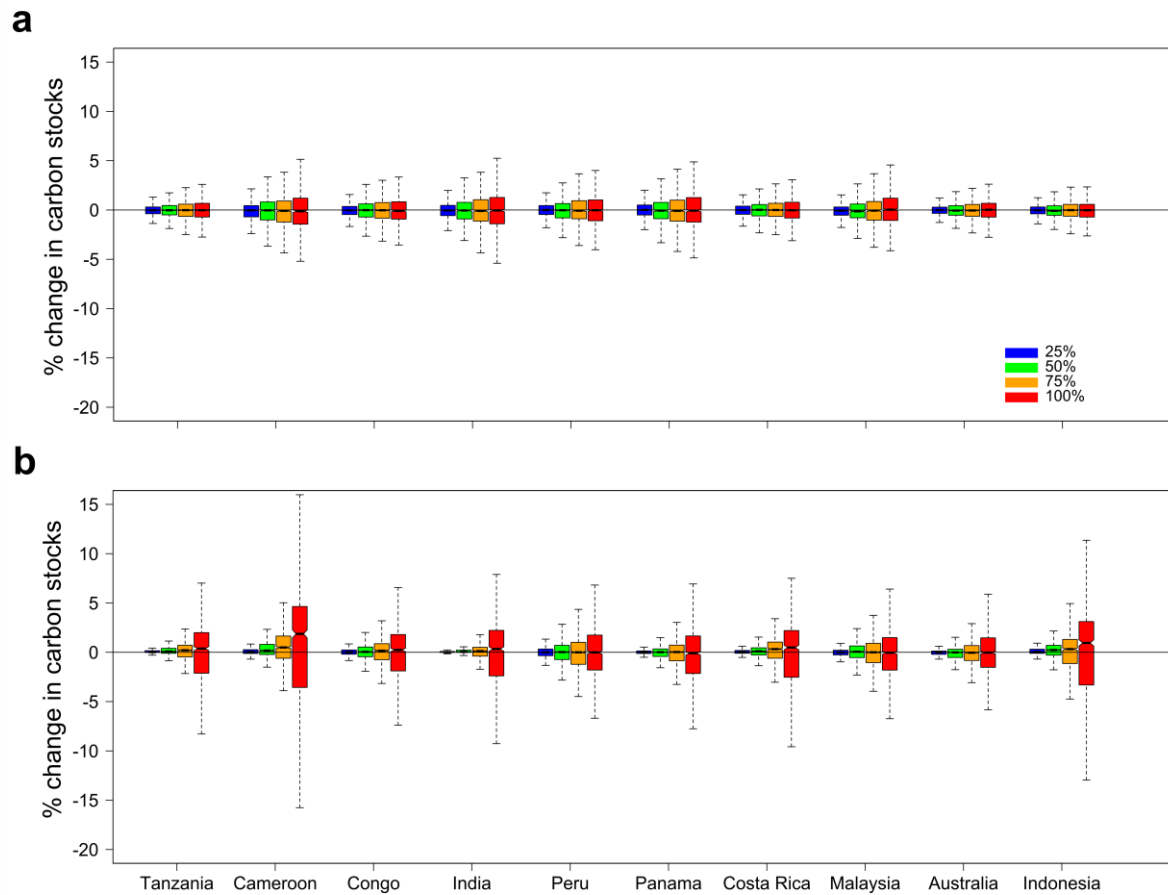

**Supplementary Figure 1.** Changes in carbon stocks in two control scenarios in which equal numbers of (a) individuals and (b) species as those extirpated in the 25%, 50%, 75% and 100% levels of the defaunation scenarios (manuscript Fig. 1) were removed

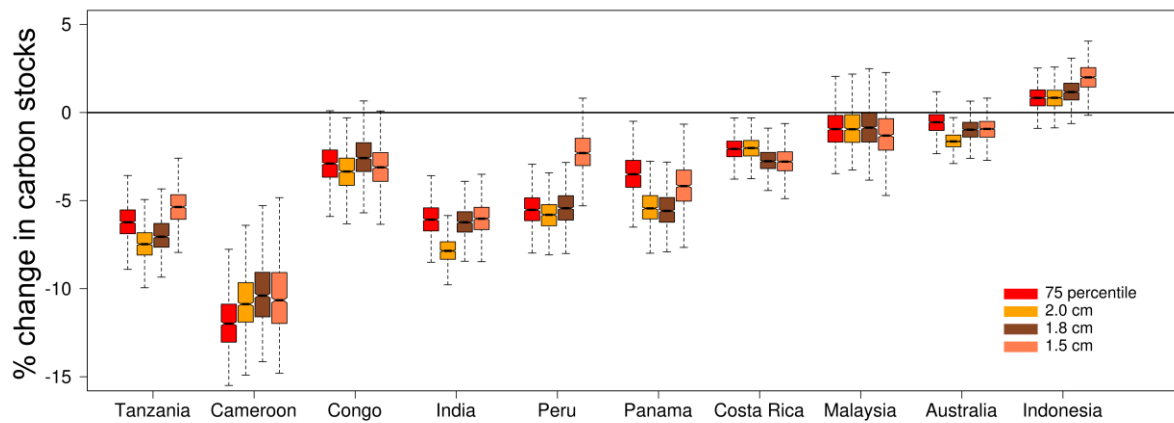

**Supplementary Figure 2.** Sensitivity of carbon storage responses to the threshold seed size used to define large-seeded species. Boxes represent change in carbon stocks for 100% removal of large-seeded animal-dispersed species using different seed length thresholds to define large-seeded species, namely, the 75<sup>th</sup> percentile seed length for each community, 2.0 cm, 1.8 cm and 1.5 cm. Simulations using different definitions consistently produced similar results

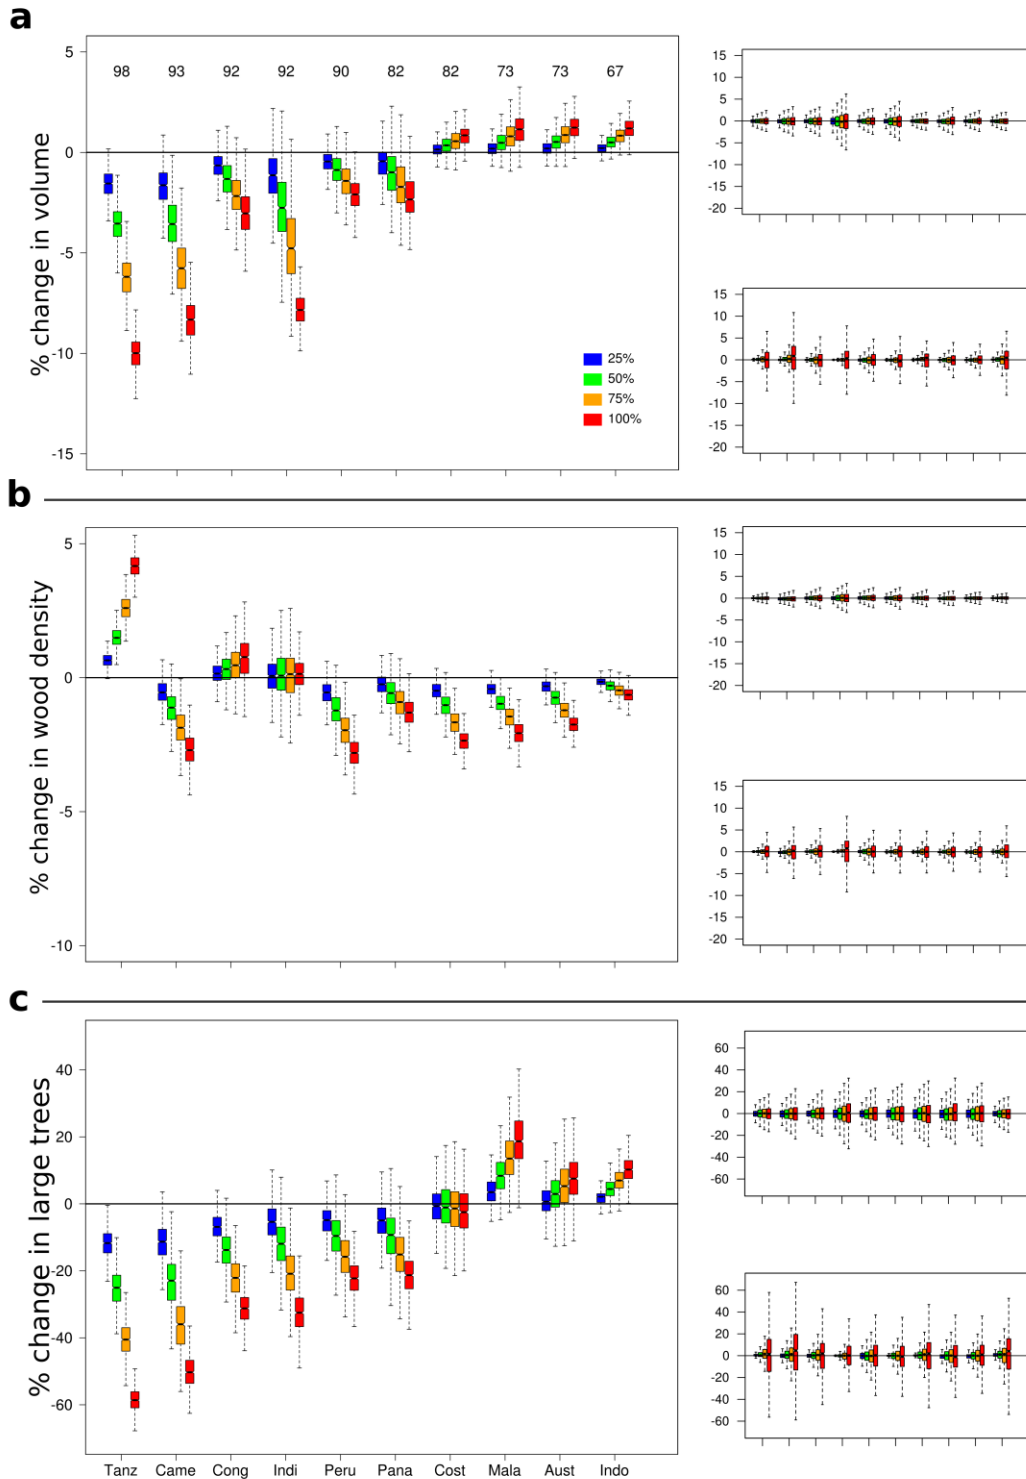

**Supplementary Figure 3.** Changes in (a) stand volumes, (b) community-weighted wood densities and (c) relative abundance of large trees ( $\geq 70$  cm DBH) relative to original values for 1000 simulation runs following removal of 25%, 50%, 75% and 100% of individuals belonging to large-seeded animal-dispersed tree species. The small plots towards the right of each panel represent corresponding responses in control scenarios in which equal numbers of individuals (above) and species (below) as those extirpated in the defaunation scenarios were removed

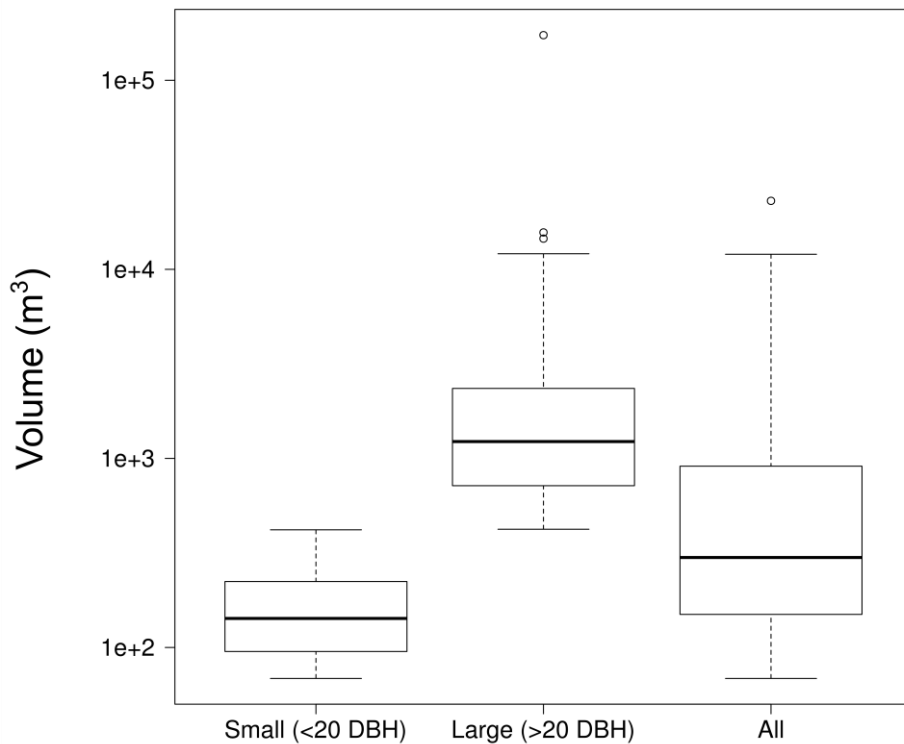

**Supplementary Figure 4.** Boxplots showing that for a given basal area ( $30\text{m}^2 \text{ha}^{-1}$ ), forest stands comprising only small trees (<20 cm DBH) have less volume than stands comprising large trees (>20 cm DBH) or mixed stands with small and large trees (All). Equal basal area stands were assembled through simulations by randomly drawing individuals from the pool of small trees, large trees and all trees within the overall pool

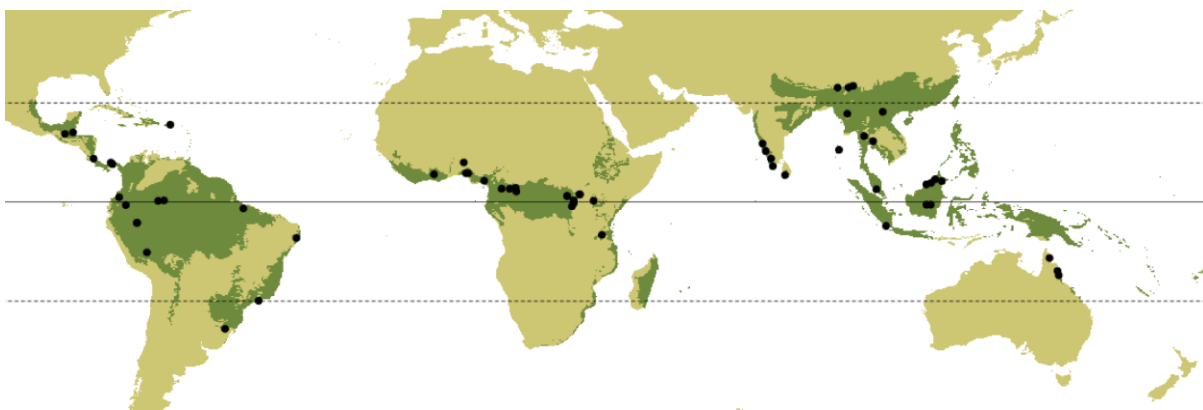

**Supplementary Figure 5.** Map showing the locations of 59 tree community datasets that were used to assess the prevalence of animal-dispersed tree species across tropical forest regions (also see Fig. 4 of the main text and Supplementary References 1-44). Regions shaded green depict “Tropical and subtropical moist broadleaf forests” as defined in WWF’s Terrestrial Ecoregions of the World<sup>78</sup>, downloaded from <http://www.worldwildlife.org/publications/terrestrial-ecoregions-of-the-world>

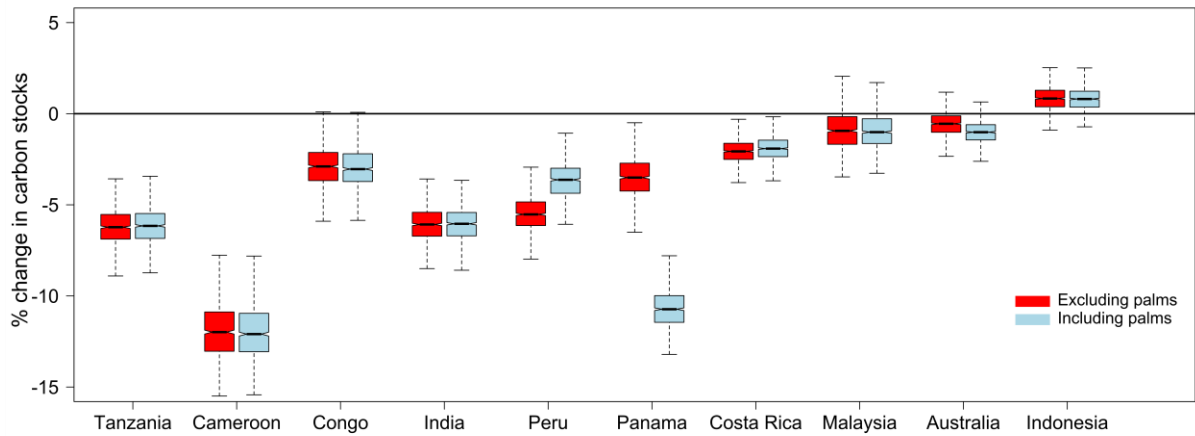

**Supplementary Figure 6.** Sensitivity of carbon storage responses to exclusion of palms from the simulations. Boxes represent simulated changes in carbon stocks following removal of all large-seeded animal-dispersed species from tree communities with palms either excluded (red) or included (blue). Simulations excluding and including palms consistently produced similar results

### Supplementary Tables

**Supplementary Table 1:** Simulated defaunation effects on carbon stocks, volume, wood density and relative abundances of large trees. Differences in median % change between defaunation and individual-based control scenarios (D-C1) and defaunation and species-based control scenarios (D-C2) for these responses at different extirpation levels are presented

| Response      | Country    | 25% removal |       | 50% removal |       | 75% removal |       | 100% removal |        |
|---------------|------------|-------------|-------|-------------|-------|-------------|-------|--------------|--------|
|               |            | D-C1        | D-C2  | D-C1        | D-C2  | D-C1        | D-C2  | D-C1         | D-C2   |
| Carbon stocks | Tanzania   | -0.91       | -0.96 | -2.15       | -2.26 | -3.88       | -4.10 | -6.21        | -6.60  |
|               | Cameroon   | -2.37       | -2.44 | -5.13       | -5.34 | -8.21       | -8.78 | -11.86       | -13.85 |
|               | Congo      | -0.55       | -0.60 | -1.20       | -1.26 | -2.04       | -2.23 | -2.80        | -3.13  |
|               | India      | -0.79       | -0.84 | -2.00       | -2.09 | -3.52       | -3.73 | -6.03        | -6.41  |
|               | Peru       | -1.12       | -1.12 | -2.31       | -2.35 | -3.78       | -3.84 | -5.50        | -5.51  |
|               | Panama     | -0.66       | -0.66 | -1.51       | -1.59 | -2.55       | -2.65 | -3.44        | -3.41  |
|               | Costa Rica | -0.45       | -0.47 | -0.95       | -1.05 | -1.52       | -1.84 | -2.04        | -2.55  |
|               | Malaysia   | -0.21       | -0.26 | -0.36       | -0.55 | -0.64       | -0.70 | -0.97        | -0.89  |
|               | Australia  | -0.12       | -0.14 | -0.20       | -0.25 | -0.37       | -0.37 | -0.58        | -0.52  |
|               | Indonesia  | +0.14       | +0.07 | +0.39       | +0.07 | +0.57       | +0.23 | +0.86        | -0.12  |

|                                   |            |        |        |        |        |        |        |        |        |
|-----------------------------------|------------|--------|--------|--------|--------|--------|--------|--------|--------|
| Volume                            | Tanzania   | -1.52  | -1.55  | -3.52  | -3.60  | -6.18  | -6.37  | -9.98  | -10.02 |
|                                   | Cameroon   | -1.59  | -1.63  | -3.51  | -3.66  | -5.72  | -6.00  | -8.21  | -9.19  |
|                                   | Congo      | -0.61  | -0.65  | -1.27  | -1.35  | -2.08  | -2.24  | -2.97  | -3.01  |
|                                   | India      | -1.10  | -1.14  | -2.67  | -2.76  | -4.60  | -4.80  | -7.79  | -8.19  |
|                                   | Peru       | -0.43  | -0.45  | -0.85  | -0.85  | -1.40  | -1.34  | -2.07  | -2.06  |
|                                   | Panama     | -0.42  | -0.44  | -0.97  | -1.00  | -1.60  | -1.70  | -2.23  | -2.03  |
|                                   | Costa Rica | +0.16  | +0.13  | +0.37  | +0.26  | +0.53  | +0.34  | +0.91  | +0.38  |
|                                   | Malaysia   | +0.25  | +0.20  | +0.57  | +0.45  | +0.86  | +0.81  | +1.08  | +1.23  |
|                                   | Australia  | +0.21  | +0.19  | +0.57  | +0.51  | +0.88  | +0.90  | +1.22  | +1.22  |
|                                   | Indonesia  | +0.24  | +0.17  | +0.56  | +0.34  | +0.87  | +0.61  | +1.22  | +0.71  |
| Relative abundance of large trees | Tanzania   | -11.52 | -11.79 | -25.12 | -25.45 | -40.69 | -42.17 | -58.48 | -60.03 |
|                                   | Cameroon   | -11.14 | -11.31 | -22.55 | -23.53 | -35.92 | -37.37 | -50.19 | -54.94 |
|                                   | Congo      | -6.93  | -6.88  | -13.5  | -14.07 | -22.02 | -22.77 | -31.36 | -33.14 |
|                                   | India      | -4.99  | -5.39  | -12.05 | -11.93 | -20.29 | -20.95 | -33.19 | -32.70 |
|                                   | Peru       | -4.97  | -4.83  | -9.10  | -9.33  | -15.58 | -15.56 | -22.44 | -22.57 |
|                                   | Panama     | -4.83  | -4.96  | -9.32  | -9.42  | -15.37 | -15.04 | -21.45 | -20.41 |
|                                   | Costa Rica | -0.68  | -0.76  | -1.23  | -1.65  | -1.72  | -2.66  | -1.62  | -4.43  |
|                                   | Malaysia   | +3.87  | +3.48  | +8.82  | +8.17  | +13.79 | +13.39 | +17.97 | +19.83 |
|                                   | Australia  | +0.94  | +0.66  | +3.30  | +2.81  | +5.20  | +5.36  | +7.30  | +6.53  |
|                                   | Indonesia  | +2.20  | +1.87  | +4.70  | +3.17  | +7.05  | +5.52  | +10.39 | +6.10  |
| Wood density                      | Tanzania   | +0.64  | +0.64  | +1.51  | +1.45  | +2.62  | +2.50  | +4.17  | +4.07  |
|                                   | Cameroon   | -0.43  | -0.51  | -0.99  | -1.05  | -1.72  | -1.86  | -2.53  | -2.93  |
|                                   | Congo      | +0.15  | +0.14  | +0.30  | +0.25  | +0.43  | +0.37  | +0.74  | +0.57  |
|                                   | India      | +0.07  | +0.05  | +0.05  | +0.03  | +0.05  | +0.01  | +0.21  | -0.64  |
|                                   | Peru       | -0.59  | -0.56  | -1.29  | -1.30  | -2.02  | -1.95  | -2.90  | -2.85  |
|                                   | Panama     | -0.26  | -0.25  | -0.58  | -0.56  | -0.91  | -0.89  | -1.35  | -1.44  |
|                                   | Costa Rica | -0.50  | -0.48  | -1.04  | -1.01  | -1.68  | -1.63  | -2.36  | -2.34  |
|                                   | Malaysia   | -0.37  | -0.37  | -0.92  | -0.93  | -1.43  | -1.41  | -2.03  | -2.01  |
|                                   | Australia  | -0.32  | -0.32  | -0.73  | -0.73  | -1.22  | -1.18  | -1.73  | -1.64  |
|                                   | Indonesia  | -0.18  | -0.17  | -0.33  | -0.30  | -0.52  | -0.45  | -0.68  | -0.68  |

**Supplementary Table 2:** The percentage of simulation runs in which carbon stocks reduced following simulated extirpations of large-seeded animal-dispersed trees at each site, along with corresponding values for the two control scenarios

| Site     | % of simulation runs in which carbon stocks were reduced |     |     |      |                                                                |     |     |      |                                                           |     |     |      |
|----------|----------------------------------------------------------|-----|-----|------|----------------------------------------------------------------|-----|-----|------|-----------------------------------------------------------|-----|-----|------|
|          | Defaunation<br>(Large-seeded species removed)            |     |     |      | Control-1<br>( Equal numbers of individuals removed at random) |     |     |      | Control-2<br>(Equal numbers of species removed at random) |     |     |      |
|          | 25%                                                      | 50% | 75% | 100% | 25%                                                            | 50% | 75% | 100% | 25%                                                       | 50% | 75% | 100% |
| Tanzania | 92                                                       | 99  | 100 | 100  | 53                                                             | 51  | 52  | 51   | 51                                                        | 33  | 38  | 44   |
| Cameroon | 95                                                       | 99  | 100 | 100  | 52                                                             | 51  | 52  | 53   | 42                                                        | 38  | 36  | 39   |
| Congo    | 79                                                       | 90  | 96  | 99   | 52                                                             | 51  | 51  | 53   | 48                                                        | 46  | 45  | 48   |
| India    | 83                                                       | 93  | 99  | 100  | 52                                                             | 52  | 52  | 51   | 63                                                        | 37  | 37  | 46   |

|            |    |    |    |     |    |    |    |    |    |    |    |    |
|------------|----|----|----|-----|----|----|----|----|----|----|----|----|
| Peru       | 91 | 97 | 99 | 100 | 50 | 51 | 52 | 51 | 49 | 50 | 50 | 50 |
| Panama     | 79 | 87 | 94 | 100 | 50 | 51 | 52 | 51 | 54 | 48 | 48 | 51 |
| Costa Rica | 78 | 87 | 94 | 100 | 50 | 50 | 50 | 51 | 43 | 41 | 39 | 45 |
| Malaysia   | 70 | 74 | 76 | 79  | 55 | 56 | 52 | 49 | 53 | 47 | 50 | 52 |
| Australia  | 61 | 66 | 71 | 80  | 52 | 52 | 52 | 49 | 49 | 51 | 52 | 51 |
| Indonesia  | 37 | 23 | 15 | 10  | 51 | 54 | 50 | 51 | 39 | 38 | 40 | 40 |

**Supplementary Table 3:** Output of linear mixed effects model comparing species' maximum diameters, maximum attainable heights and wood densities across seed size and dispersal groups (fixed effects) with site included as a grouping term in the random part of the models.

| <b>Seed dispersal category</b> | <b>Maximum diameter (cm)<br/>Mean (<math>\pm 1SE</math>)</b> | <b>Maximum attainable height (m)<br/>Mean (<math>\pm 1SE</math>)</b> | <b>Wood density (<math>g \cdot cm^{-3}</math>)<br/>Mean (<math>\pm 1SE</math>)</b> |
|--------------------------------|--------------------------------------------------------------|----------------------------------------------------------------------|------------------------------------------------------------------------------------|
| Small-seeded animal-dispersed  | 35.25 ( $\pm 1.40$ )                                         | 22.51 ( $\pm 0.62$ )                                                 | 0.60 ( $\pm 0.01$ )                                                                |
| Large-seeded animal -dispersed | 43.61 ( $\pm 2.98$ )                                         | 28.45 ( $\pm 1.22$ )                                                 | 0.63 ( $\pm 0.02$ )                                                                |
| Abiotically-dispersed          | 50.92 ( $\pm 1.78$ )                                         | 32.19 ( $\pm 0.81$ )                                                 | 0.59 ( $\pm 0.01$ )                                                                |

**Supplementary Table 4:** Dataset and site details for the ten tree community plot data used for simulations

| Sl. No. | Country    | Location                                                   | Dataset identifier                                                                                                      | Sampling year | Latitude | Longitude | No. of plots | Plot size (ha) | Plot IDs                           | Mean annual precipitation (mm) |
|---------|------------|------------------------------------------------------------|-------------------------------------------------------------------------------------------------------------------------|---------------|----------|-----------|--------------|----------------|------------------------------------|--------------------------------|
| 1       | Australia  | Mount Lewis, Agapetes, Whyanbeel, Oliver Creek and Fantail | Ecological Archives E095-209<br><a href="http://dx.doi.org/10.1890/14-0458R.1">http://dx.doi.org/10.1890/14-0458R.1</a> | 2012/2013     | -16.3    | 145.2     | 6            | 0.5            | ep18, ep30, ep35, ep40, ep41, ep44 | 2600                           |
| 2       | Cameroon   | Korup National Park                                        | TEAM-DataPackage-20140701065026_1902                                                                                    | 2013          | 5.06     | 8.85      | 6            | 1              | VG-KRP-1 to VG-KRP-6               | 5300                           |
| 3       | Panama     | Barro Colorado Nature Monument - Soberania National Park   | TEAM-DataPackage-20140701042113_1315                                                                                    | 2011          | 9.156    | -79.78    | 6            | 1              | VG-BCI-1 to VG-BCI-6               | 2900                           |
| 4       | Indonesia  | Bukit Barisan                                              | TEAM-DataPackage-20140701043656_1496                                                                                    | 2012          | -5.65    | 104.44    | 6            | 1              | VG-BBS-1 to VG-BBS-6               | 2950                           |
| 5       | Malaysia   | Pasoh Forest Reserve                                       | TEAM-DataPackage-20140701070537_1695                                                                                    | 2013          | 3.03     | 102.13    | 6            | 1              | VG-PSH-1 to VG-PSH-6               | 2050                           |
| 6       | Costa Rica | Volcán Barva                                               | TEAM-DataPackage-20140701071921_1728                                                                                    | 2013          | 10.29    | -84.06    | 5            | 1              | VG-VB-1 to VG-VB-4 and VG-VB-9     | 4000                           |
| 7       | Congo      | Nouabalé Ndoki                                             | TEAM-DataPackage-20140701070319_1368                                                                                    | 2013          | 2.5      | 16.49     | 6            | 1              | VG-NNN-1 to VG-NNN-6               | 1670                           |
| 8       | Tanzania   | Udzungwa Mountains National Park                           | TEAM-DataPackage-20140701071705_1335                                                                                    | 2013          | -7.77    | 36.87     | 6            | 1              | VG-UDZ-1 to VG-UDZ-6               | 2000                           |
| 9       | Peru       | Cocha Cashu - Manu National Park                           | TEAM-DataPackage-20140701045947_1389                                                                                    | 2013          | -11.91   | -71.36    | 6            | 1              | VG-COU-1 to VG-COU-6               | 2100                           |
| 10      | India      | Central Western Ghats                                      | Ecological Archives E091-216-D1                                                                                         | 1997          | 13.63    | 75.02     | 5            | 1              | BSP69, BSP73, BSP74, BS75, BSP104  | 6750                           |



## Supplementary References

1. Adekunle, V. A. J. Conservation of tree species diversity in tropical rainforest ecosystem of south-west Nigeria. *J. Trop. For. Sci.* **18**, 91 (2006).
2. Asase, A., Asiatokor, B. K. & Ofori-Frimpong, K. Effects of selective logging on tree diversity and some soil characteristics in a tropical forest in southwest Ghana. *J. For. Res.* **25**, 171–176 (2014).
3. Bhuyan, P., Khan, M. L. & Tripathi, R. S. Tree diversity and population structure in undisturbed and human-impacted stands of tropical wet evergreen forest in Arunachal Pradesh, Eastern Himalayas, India. *Biodivers. Conserv.* **12**, 1753–1773 (2003).
4. Bradford, M. G., Murphy, H. T., Ford, A. J., Hogan, D. L. & Metcalfe, D. J. Long-term stem inventory data from tropical rain forest plots in Australia: Ecological Archives E095-209. *Ecology* **95**, 2362–000 (2014).
5. Brewer, S. W. & Webb, M. A. H. A seasonal evergreen forest in Belize: unusually high tree species richness for northern Central America. *Bot. J. Linn. Soc.* **138**, 275–296 (2002).
6. Budke, J. C., Jarenkow, J. A. & de Oliveira-Filho, A. T. Tree community features of two stands of riverine forest under different flooding regimes in Southern Brazil. *Flora-Morphology, Distrib. Funct. Ecol. Plants* **203**, 162–174 (2008).
7. Cattanio, J. H., Anderson, A. B. & Carvalho, M. S. Floristic composition and topographic variation in a tidal floodplain forest in the Amazon Estuary. *Rev. Bras. Botânica* **25**, 419–430 (2002).
8. Condit, R. Cocoli 4 ha plot tables. *Smithsonian Tropical Research Institute* (2015). at <<http://www.ctfs.si.edu/site/Cocoli>>
9. Ewango, C. E. N., Makana, J.-R., Hart, T. & Hart, J. Egoro species abundance tables. *Smithsonian Tropical Research Institute* (2015). at <<http://www.ctfs.si.edu/site/Ituri>>
10. Bunyavejchewin, S. Huai Kha Khaeng species abundance tables. *Smithsonian Tropical Research Institute* (2015). at <<http://www.ctfs.si.edu/site/Huai+Kha+Khaeng>>
11. Alvarez, M. La Planada species abundance tables. *Smithsonian Tropical Research Institute* (2015). at <<http://www.ctfs.si.edu/site/La+Planada>>
12. Tan, S., Itoh, A., Davies, S. & Yamakura, T. Lambir species abundance tables. *Smithsonian Tropical Research Institute* (2015). at <<http://www.ctfs.si.edu/site/Lambir>>
13. Ewango, C. E. N., Makana, J.-R., Hart, T. & Hart, J. Lenda species abundance tables. *Smithsonian Tropical Research Institute* (2015). at <<http://www.ctfs.si.edu/site/Ituri>>
14. Zimmerman, J., Thompson, J. & Brokaw, N. Luquillo species abundance tables. *Smithsonian Tropical Research Institute* (2015). at <<http://www.ctfs.si.edu/site/Luquillo>>
15. Brockelman, W. Y. & Nathalang, A. Mo Singto species abundance tables. *Smithsonian Tropical Research Institute* (2015). at <<http://www.ctfs.si.edu/site/Mo+Singto>>
16. Condit, R. Sherman species abundance tables. *Smithsonian Tropical Research Institute* (2015). at <<http://www.ctfs.si.edu/site/Sherman>>
17. Valencia, R. Yasuni species abundance tables. *Smithsonian Tropical Research Institute* (2015). at <<http://www.ctfs.si.edu/site/Yasuni>>
18. Eggeling, W. J. Observations on the ecology of the Budongo rain forest, Uganda. *J. Ecol.* **34**, 20–87 (1947).
19. Eilu, G. & Obua, J. Tree condition and natural regeneration in disturbed sites of Bwindi Impenetrable Forest National Park, southwestern Uganda. *Trop. Ecol.* **46**, 99–

- 112 (2005).
20. Fashing, P. J., Forrestel, A., Scully, C. & Cords, M. Long-term tree population dynamics and their implications for the conservation of the Kakamega Forest, Kenya. *Biodivers. Conserv.* **13**, 753–771 (2004).
  21. Hall, J., Harris, D., Medjibe, V. & Ashton, M. The effects of selective logging on forest structure and tree species composition in a Central African forest: implications for management of conservation areas. *For. Ecol. Manage.* **183**, 249–264 (2003).
  22. Hardy, O. J. & Sonké, B. Spatial pattern analysis of tree species distribution in a tropical rain forest of Cameroon: assessing the role of limited dispersal and niche differentiation. *For. Ecol. Manage.* **197**, 191–202 (2004).
  23. Hashimoto, C., Furuichi, T., Tashiro, Y. & Kimura, D. Vegetation of the Kalinzu Forest, Uganda: Ordination of forest types using Principal Component Analysis. *African Study Monographs* **20**, 229–239 (1999).
  24. Hernández-Ruedas, M. A. *et al.* Conserving tropical tree diversity and forest structure: the value of small rainforest patches in moderately-managed landscapes. *PLOS One* DOI: 10.1371/journal.pone.0098931 (2014).
  25. Htun, N. Z., Mizoue, N. & Yoshida, S. Tree species composition and Diversity at different levels of disturbance in Popa Mountain Park, Myanmar. *Biotropica* **43**, 597–603 (2011).
  26. Ipor, I., Sani, H. & Tawan, C. Floristic composition of forest formation at Mahua, Crocker range national park, Sabah. *ASEAN Rev. Biodivers. Environ. Conserv. (ARBEC)*, July-September 1–8 (2002).
  27. Lopes, A. V., Girão, L. C., Santos, B. A., Peres, C. A. & Tabarelli, M. Long-term erosion of tree reproductive trait diversity in edge-dominated Atlantic forest fragments. *Biol. Conserv.* **142**, 1154–1165 (2009).
  28. Lwanga, J. S., Butynski, T. M. & Struhsaker, T. T. Tree population dynamics in Kibale National park, Uganda 1975–1998. *Afr. J. Ecol.* **38**, 238–247 (2000).
  29. McLennan, M. R. & Plumptre, A. J. Protected apes, unprotected forest: composition, structure and diversity of riverine forest fragments and their conservation value in Uganda. *Trop. Conserv. Sci.* **5**, 79–103 (2012).
  30. Muthuramkumar, S. *et al.* Plant community structure in tropical rain forest fragments of the Western Ghats, India. *Biotropica* **38**, 143–160 (2006).
  31. Nath, P. C., Arunachalam, A., Khan, M. L., Arunachalam, K. & Barbhuiya, A. R. Vegetation analysis and tree population structure of tropical wet evergreen forests in and around Namdapha National Park, northeast India. *Biodivers. Conserv.* **14**, 2109–2135 (2005).
  32. Nebel, G. *et al.* Structure and floristic composition of flood plain forests in the Peruvian Amazon: I. Overstorey. *For. Ecol. Manage.* **150**, 27–57 (2001).
  33. Newbery, D. M., Campbell, E. J. F., Proctor, J. & Still, M. J. Primary lowland dipterocarp forest at Danum Valley, Sabah, Malaysia. Species composition and patterns in the understorey. *Vegetatio* **122**, 193–220 (1996).
  34. Okali, D. U. U. & Ola-Adams, B. A. Tree population changes in treated rain forest at Omo Forest Reserve, south-western Nigeria. *J. Trop. Ecol.* **3**, 291–313 (1987).
  35. Osuri, A. M., Kumar, V. S. & Sankaran, M. Altered stand structure and tree allometry reduce carbon storage in evergreen forest fragments in India's Western Ghats. *For. Ecol. Manage.* **329**, 375–383 (2014).
  36. Parthasarathy, N. Tree diversity and distribution in undisturbed and human-impacted sites of tropical wet evergreen forest in southern Western Ghats, India. *Biodivers. Conserv.* **8**, 1365–1381 (1999).
  37. Rajkumar, M. & Parthasarathy, N. Tree diversity and structure of Andaman giant

- evergreen forests, India. *Taiwania* **53**, 356–368 (2008).
38. Sanchez, M., Pedroni, F., Eisenlohr, P. V. & Ary T. Oliveira-Filho. Changes in tree community composition and structure of Atlantic rain forest on a slope of the Serra do Mar range, southeastern Brazil, from near sea level to 1000m of altitude. *Flora-Morphology, Distrib. Funct. Ecol. Plants* **208**, 184–196 (2013).
  39. Simbolon, H., Suzuki, E. & Susanti, R. in *The Biodiversity Observation Network in the Asia-Pacific Region* 71–92 (Springer, 2012).
  40. Small, A., Martin, T. G., Kitching, R. L. & Wong, K. M. Contribution of tree species to the biodiversity of a 1ha Old World rainforest in Brunei, Borneo. *Biodivers. Conserv.* **13**, 2067–2088 (2004).
  41. Stropp, J., Sleen, P. Van der, Assunção, P. A., Silva, A. L. da & Steege, H. Ter. Tree communities of white-sand and terra-firme forests of the upper Rio Negro. *Acta Amaz.* **41**, 521–544 (2011).
  42. Tajeukem, V. C., Fongzossie Fedoung, E., Kemeuze, V. A. & Nkongmeneck, B.-A. Vegetation structure and species composition at the northern periphery of the Boumba-Bek National Park, Southeastern Cameroon. *Afr. Study Monogr.* **49**, 13–46 (2014).
  43. Van Do, T., Osawa, A. & Thang, N. T. Recovery process of a mountain forest after shifting cultivation in Northwestern Vietnam. *For. Ecol. Manage.* **259**, 1650–1659 (2010).
  44. Velho, N. & Krishnadas, M. Post-logging recovery of animal-dispersed trees in a tropical forest site in north-east India. *Trop. Conserv. Sci.* **4**, 405–419 (2011).
  45. Cooper, W. & T Cooper, W. *Fruits of the Australian tropical rainforest*. (CSIRO, 2004).
  46. Bendezú, Y. F. *Árboles nativos de la Región Ucayali Peru*. (Pucallpa, Enero, 2014).
  47. Dennis, A. J., Schupp, E. W., Green, R. J. & Wescott, D. A. *Seed dispersal: theory and its application in a changing world*. (CABI, 2007).
  48. Standley, P. C. *Flora of Costa Rica*. (Field Museum of Natural History).
  49. Burger, W. C. *Flora Costaricensis*. (Field Museum of Natural history).
  50. Standley, P. C. & Steyermark, J. A. *Flora of Guatemala*. (Field Museum of Natural history, 1937).
  51. Macbride, J. F., Gentry, A. H., Dillon, M. O. & Jones, S. B. *Flora of Peru*. (Field Museum of Natural History, 1960).
  52. van Steenis, C. G. G. J. *Flora Malesiana*. (Noordhoff-Kolff NV, 1950).
  53. Soepadmo, E., Saw, L. G. & Wong, K. M. *Tree flora of Sabah and Sarawak*. (Sabah Forestry Department, Forestry Research Institute Malaysia and Sarawak Forestry Department, 1995).
  54. *The Gardens' Bulletin, Singapore*. (Government of Singapore).
  55. *Annals of the Missouri Botanical Gardens*. (Missouri Botanical Gardens Press).
  56. *Journal of the Arnold Arboretum*. (Harvard University).
  57. Africa Tree Database. (2012). at <<http://www.africatreedatabase.com/>>
  58. PROTA. Plant resources of tropical Africa. (2014). at <<http://www.prota.org/>>
  59. Botanic Garden Meise. The Digitised Flora of Central Africa. (2013). at <<http://www.br.fgov.be/RESEARCH/DATABASES/FOCA/abbreviations.php>>
  60. CSIRO. Australian tropical rainforest plants. (2010). at <<http://www.anbg.gov.au/cpbr/cd-keys/rfk/>>
  61. Australian Biological Resources Study. Flora of Australia online. (2014). at <<http://www.anbg.gov.au/abrs/online-resources/flora/main-query-styles.html>>
  62. Smithsonian Institution. Flora of Barro Colorado Island (Stanford University Press, 1978). at <<http://biogeodb.stri.si.edu/bioinformatics/croat/home>>

63. Smithsonian Institution. STRI herbarium website. at  
<<http://biogeodb.stri.si.edu/herbarium/>>
64. INBio. Biodiversity of Costa Rica. (2014). at <<http://atta2.inbio.ac.cr/neoportal-web>>
65. Castro, E. La Selva florula digital. (2013). at <<http://guarea.ots.ac.cr/florula4/>>
66. Slik, F. Plants of southeast Asia. at <<http://www.asianplant.net/>>
67. Ramesh, B. R. *et al.* Biodiversity Information and Co-operation in Taxonomy for Interactive Shared Knowledge Base (BIOTIK): Western Ghats. (2007).
68. India Biodiversity Portal. (2014). at <<http://indiabiodiversity.org/>>
69. Peter C. van Welzen. Euphorbiaceae of Malesia. (2014). at  
<<http://www.nationaalherbarium.nl/Euphorbs/>>
70. Conn, B. J. & Damas, K. Q. Guide to trees of Papua New Guinea. (2005). at  
<<http://www.pngplants.org/PNGtrees/>>
71. Zanne, A. E. *et al.* Global wood density database. *Dryad. Identifier: http://hdl.handle.net/10255/dryad* (2009).
72. Royal Botanic Gardens Kew. Seed Information Database V7.1. (2014). at  
<<http://data.kew.org/sid/>>
73. World Agroforestry Centre. Agroforestry database. (2014). at  
<<http://www.worldagroforestry.org/resources/databases/agroforestry>>
74. Fern, K. Useful tropical plants database. (2014). at <<http://tropical.theferns.info/>>
75. Paine, T. & Alvarez, P. Plants of Manu National Park. (2014). at  
<<http://manuplants.org/>>
76. JSTOR. JSTOR global plants. (2015). at <<https://plants.jstor.org/>>
77. Royal Botanical Gardens, K. The Herbarium Catalogue. (2014). at  
<http://www.kew.org/hercat>
78. Olson, D. M., *et al.* Terrestrial ecoregions of the world: a new map of life on Earth. *Bioscience* 51: 933-938. (2001)
